# Supplementary material
Source: MDPI journal article supplement (https://www.mdpi.com/2071-1050/14/4/1986)
Supplement: s1 [file s1]

**Table S1:** The water quality parameters of PW

| Parameter     | Amount    |
|---------------|-----------|
| pH            | 8         |
| Total COD     | 2000 mg/L |
| Suspended COD | 1344      |
| BOD           | 500 mg/L  |
| TOC           | 700 mg/L  |
| TSS           | 185 mg/L  |
| Turbidity     | 90 NTU    |
